# Supplementary material
Source: PubMed Central journal article supplement (PMC5354515)
Supplement: 10.1074_M116.759118_jbc.M116.759118-1.pdf [file 10.1074_M116.759118_jbc.M116.759118-1.pdf]

## SUPPORTING INFORMATION

PrenDB: A substrate prediction database to enable biocatalytic use of prenyltransferases

**Jakub Gunera**<sup>‡†1</sup>, **Florian Kindinger**<sup>§1</sup>, **Shu-Ming Li**<sup>§†2</sup> and **Peter Kolb**<sup>‡†3</sup>

<sup>‡</sup> Department of Pharmaceutical Chemistry, Philipps-University, Marburg, Hesse, 35032, Germany

<sup>§</sup> Institute of Pharmaceutical Biology and Biotechnology, Philipps-University, Marburg, Hesse, 35032, Germany

<sup>†</sup> Synmikro, LOEWE Centre for Synthetic Microbiology, Philipps-University, Marburg, Hesse, 35043, Germany

<sup>1</sup>These authors contributed equally to this study.

<sup>2</sup>To whom correspondence should be addressed: [shuming.li@staff.uni-marburg.de](mailto:shuming.li@staff.uni-marburg.de)

<sup>3</sup>To whom correspondence should be addressed: [peter.kolb@uni-marburg.de](mailto:peter.kolb@uni-marburg.de)

**Table S1:** List of substrates with their PrenDB ID, SMILES string and cluster membership (C)

| ID  | PrenDB ID    | SMILES                                                                   | C |
|-----|--------------|--------------------------------------------------------------------------|---|
| S1  | PTDBSUB00695 | <chem>O=C1NC(Cc2c[nH]c3ccccc23)C(=O)N2CCC[C@@H]12</chem>                 | 1 |
| S2  | PTDBSUB00027 | <chem>O=C1N[C@H](Cc2c[nH]c3ccccc23)C(=O)N2CCC[C@H]12</chem>              | 1 |
| S3  | PTDBSUB00022 | <chem>O=C1N[C@H](Cc2c[nH]c3ccccc23)C(=O)N2CCC[C@@H]12</chem>             | 1 |
| S4  | PTDBSUB00001 | <chem>O=C1N[C@@H](Cc2c[nH]c3ccccc23)C(=O)N2CCC[C@@H]12</chem>            | 1 |
| S5  | PTDBSUB00017 | <chem>O=C1N[C@@H](Cc2c[nH]c3ccccc23)C(=O)N2CCC[C@H]12</chem>             | 1 |
| S6  | PTDBSUB00286 | <chem>O=C1N[C@H](Cc2c[nH]c3ccccc23)C(=O)Nc2ccccc21</chem>                | 2 |
| S7  | PTDBSUB00392 | <chem>O=C1N[C@@H](Cc2c[nH]c3ccccc23)C(=O)Nc2ccccc21</chem>               | 2 |
| S8  | PTDBSUB00049 | <chem>C[C@@H]1NC(=O)[C@@H](Cc2c[nH]c3ccccc23)NC1=O</chem>                | 2 |
| S9  | PTDBSUB00044 | <chem>C[C@H]1NC(=O)[C@@H](Cc2c[nH]c3ccccc23)NC1=O</chem>                 | 2 |
| S10 | PTDBSUB00032 | <chem>C[C@@H]1NC(=O)[C@H](Cc2c[nH]c3ccccc23)NC1=O</chem>                 | 2 |
| S11 | PTDBSUB00039 | <chem>C[C@H]1NC(=O)[C@H](Cc2c[nH]c3ccccc23)NC1=O</chem>                  | 2 |
| S12 | PTDBSUB00012 | <chem>O=C1N[C@@H](Cc2c[nH]c3ccccc23)C(=O)N[C@H]1Cc1ccccc1</chem>         | 2 |
| S13 | PTDBSUB00005 | <chem>O=C1N[C@@H](Cc2c[nH]c3ccccc23)C(=O)N[C@H]1Cc1ccc(O)cc1</chem>      | 2 |
| S14 | PTDBSUB00412 | <chem>O=C1N[C@H](Cc2c[nH]c3ccccc23)C(=O)N[C@H]1Cc1ccc(O)cc1</chem>       | 2 |
| S15 | PTDBSUB00059 | <chem>O=C1CNC(=O)[C@H](Cc2c[nH]c3ccccc23)N1</chem>                       | 2 |
| S16 | PTDBSUB00072 | <chem>O=C1N[C@@H](Cc2c[nH]c3ccccc23)C(=O)N[C@H]1Cc1c[nH]c2ccccc12</chem> | 2 |
| S17 | PTDBSUB00054 | <chem>O=C1N[C@@H](Cc2c[nH]c3ccccc23)C(=O)N[C@H]1Cc1cnc[nH]1</chem>       | 2 |
| S18 | PTDBSUB00064 | <chem>CC(C)[C@@H]1NC(=O)[C@H](Cc2c[nH]c3ccccc23)NC1=O</chem>             | 2 |
| S19 | PTDBSUB00103 | <chem>[NH3+][C@@H](Cc1c[nH]c2ccccc12)C(=O)[O-]</chem>                    | 3 |
| S20 | PTDBSUB00173 | <chem>[NH3+][C@H](Cc1c[nH]c2ccccc12)C(=O)[O-]</chem>                     | 3 |
| S21 | PTDBSUB00186 | <chem>C[C@@]([NH3+])(Cc1c[nH]c2ccccc12)C(=O)[O-]</chem>                  | 3 |
| S22 | PTDBSUB00189 | <chem>C[C@]([NH3+])(Cc1c[nH]c2ccccc12)C(=O)[O-]</chem>                   | 3 |
| S23 | PTDBSUB00179 | <chem>[NH3+]CCc1c[nH]c2ccccc12</chem>                                    | 3 |
| S24 | PTDBSUB00415 | <chem>O=C([O-])Cc1c[nH]c2ccccc12</chem>                                  | 3 |
| S25 | PTDBSUB00491 | <chem>O=C([O-])C(=O)Cc1c[nH]c2ccccc12</chem>                             | 3 |
| S26 | PTDBSUB00297 | <chem>O=C([O-])CCc1c[nH]c2ccccc12</chem>                                 | 3 |
| S27 | PTDBSUB00496 | <chem>O=C([O-])CCCc1c[nH]c2ccccc12</chem>                                | 3 |
| S28 | PTDBSUB00676 | <chem>CC(=O)N[C@@H](Cc1c[nH]c2ccccc12)C(C)=O</chem>                      | 3 |
| S29 | PTDBSUB00317 | <chem>CC(=O)N[C@@H](Cc1c[nH]c2ccccc12)C(=O)[O-]</chem>                   | 3 |
| S30 | PTDBSUB00423 | <chem>CC(=O)N[C@H](Cc1c[nH]c2ccccc12)C(=O)[O-]</chem>                    | 3 |
| S31 | PTDBSUB00183 | <chem>C[NH2+][C@@H](Cc1c[nH]c2ccccc12)C(=O)[O-]</chem>                   | 3 |
| S32 | PTDBSUB00192 | <chem>O=C([O-])[C@@H](O)Cc1c[nH]c2ccccc12</chem>                         | 3 |
| S33 | PTDBSUB00195 | <chem>O=C([O-])[C@H](O)Cc1c[nH]c2ccccc12</chem>                          | 3 |
| S34 | PTDBSUB00176 | <chem>[NH3+][C@H](CC(=O)[O-])Cc1c[nH]c2ccccc12</chem>                    | 3 |
| S35 | PTDBSUB00418 | <chem>[NH3+][C@@H](CC(=O)[O-])Cc1c[nH]c2ccccc12</chem>                   | 3 |
| S36 | PTDBSUB00139 | <chem>[NH3+][C@@H](Cc1c[nH]c2ccccc12)C(=O)NCC(=O)[O-]</chem>             | 3 |
| S37 | PTDBSUB00488 | <chem>[NH3+][C@H](Cc1c[nH]c2ccccc12)C(=O)NO</chem>                       | 3 |
| S38 | PTDBSUB00499 | <chem>COC(=O)[C@H]([NH3+])Cc1c[nH]c2ccccc12</chem>                       | 3 |
| S39 | PTDBSUB00593 | <chem>[NH3+][C@@H](C(=O)[O-])[C@@H](O)c1ccc(O)c(O)c1</chem>              | 4 |
| S40 | PTDBSUB00722 | <chem>[NH3+][C@@H](C(=O)[O-])C(O)c1ccc(O)c(O)c1</chem>                   | 4 |

|     |              |                                                                                                |   |
|-----|--------------|------------------------------------------------------------------------------------------------|---|
| S41 | PTDBSUB00689 | Cc1ccc(C[C@@H]2NC(=O)[C@H](Cc3ccc(O)cc3)NC2=O)cc1                                              | 5 |
| S42 | PTDBSUB00571 | O=C([O-])[C@@H](O)Cc1ccc(O)cc1                                                                 | 5 |
| S43 | PTDBSUB00574 | O=C([O-])[C@H](O)Cc1ccc(O)cc1                                                                  | 5 |
| S44 | PTDBSUB00554 | [NH3+][C@@H](C(=O)[O-])c1ccc(O)cc1                                                             | 5 |
| S45 | PTDBSUB00551 | [NH3+][C@H](CC(=O)[O-])c1ccc(O)cc1                                                             | 5 |
| S46 | PTDBSUB00718 | [NH3+][C](CC(=O)[O-])c1ccc(O)cc1                                                               | 5 |
| S47 | PTDBSUB00376 | CC([NH3+])(Cc1ccc(O)cc1)C(=O)[O-]                                                              | 5 |
| S48 | PTDBSUB00578 | C[C@@]([NH3+])(Cc1ccc(O)cc1)C(=O)[O-]                                                          | 5 |
| S49 | PTDBSUB00467 | O=C(CCc1ccc(O)cc1)c1c(O)cc(O)cc1O                                                              | 5 |
| S50 | PTDBSUB00079 | O=C([O-])C(=O)Cc1ccc(O)cc1                                                                     | 5 |
| S51 | PTDBSUB00568 | O=C([O-])CCc1ccc(O)cc1                                                                         | 5 |
| S52 | PTDBSUB00666 | Oc1cc2ccccc2cc1O                                                                               | 6 |
| S53 | PTDBSUB00652 | Oc1ccc2ccccc2c1                                                                                | 6 |
| S54 | PTDBSUB00289 | Oc1ccc2ccc(O)cc2c1                                                                             | 6 |
| S55 | PTDBSUB00613 | Oc1ccc2cc(O)ccc2c1                                                                             | 6 |
| S56 | PTDBSUB00647 | Nc1cccc2ccc(O)cc12                                                                             | 6 |
| S57 | PTDBSUB00448 | COc1cccc2ccc(O)cc12                                                                            | 6 |
| S58 | PTDBSUB00451 | CCOc1cccc2ccc(O)cc12                                                                           | 6 |
| S59 | PTDBSUB00656 | Oc1ccc(O)c2ccccc12                                                                             | 6 |
| S60 | PTDBSUB00661 | Oc1cccc2c(O)cccc12                                                                             | 6 |
| S61 | PTDBSUB00399 | Oc1ccc2c(O)cccc2c1                                                                             | 6 |
| S62 | PTDBSUB00596 | Oc1cccc2ccccc12                                                                                | 6 |
| S63 | PTDBSUB00445 | Cc1ccc2ccccc(O)c2c1                                                                            | 6 |
| S64 | PTDBSUB00601 | Oc1ccc2ccccc(O)c2c1                                                                            | 6 |
| S65 | PTDBSUB00088 | COc1ccc2c3c4n(c2c1)[C@@H](C=C(C)C)OOC(C)(C)C[C@@H]4N1C(=O)[C@@H]2CCC<br>N2C(=O)[C@]1(O)[C@H]3O | 6 |
| S66 | PTDBSUB00082 | COc1ccc2c3c([nH]c2c1)[C@H](C=C(C)C)N1C(=O)[C@@H]2CCCN2C(=O)[C@]1(O)[C@<br>H]3O                 | 6 |
| S67 | PTDBSUB00085 | COc1ccc2c3c(n(CC=C(C)C)c2c1)[C@H](C=C(C)C)N1C(=O)[C@@H]2CCCN2C(=O)[C@]<br>1(O)[C@H]3O          | 6 |
| S68 | PTDBSUB00094 | Cc1cc2oc3ccccc(=O)c-3c([O-])c2cc1O                                                             | 6 |
| S69 | PTDBSUB00100 | Cc1c([O-])c(C)c2c(O)c3c(=O)cccc-3oc2c1C                                                        | 6 |
| S70 | PTDBSUB00091 | Cc1cc2oc3ccccc(=O)c-3c(O)c2c(CO)c1[O-]                                                         | 6 |
| S71 | PTDBSUB00097 | Cc1cc2oc3ccccc(=O)c-3c(O)c2c(C)c1[O-]                                                          | 6 |
| S72 | PTDBSUB00479 | COc1ccc(-c2coc3ccc(=O)cc(O)c-3c2[O-])cc1                                                       | 6 |
| S73 | PTDBSUB00472 | O=c1cc2oc(-c3ccc(O)cc3)cc([O-])c-2c(O)c1                                                       | 6 |
| S74 | PTDBSUB00343 | O=c1cc2oc3cc(O)cc([O-])c3c([O-])c-2c(O)c1                                                      | 6 |
| S75 | PTDBSUB00339 | O=c1cc2oc3ccc(O)cc3c([O-])c-2c(O)c1                                                            | 6 |
| S76 | PTDBSUB00351 | O=c1cc2oc3cc(O)ccc3c([O-])c-2c(O)c1                                                            | 6 |
| S77 | PTDBSUB00292 | O=C1C=C([O-])c2c([O-])cc(O)cc2C1=O                                                             | 6 |
| S78 | PTDBSUB00606 | O=C(O)c1cc2ccccc([O-])c2cc1O                                                                   | 6 |
| S79 | PTDBSUB00610 | O=C(O)c1cc2cc(O)ccc2cc1[O-]                                                                    | 6 |
| S80 | PTDBSUB00483 | O=C1C[C@H](c2ccccc2)Oc2cc(O)ccc21                                                              | 6 |
| S81 | PTDBSUB00454 | Cc1cc([O-])c2c(c1)O[C@H](c1ccc(O)cc1)CC2=O                                                     | 6 |
| S82 | PTDBSUB00460 | COc1ccc([C@@H]2CC(=O)c3c([O-])cc(C)cc3O2)cc1O                                                  | 6 |

|      |              |                                                                                            |    |
|------|--------------|--------------------------------------------------------------------------------------------|----|
| S83  | PTDBSUB00464 | <chem>COc1cc([C@H]2Oc3cc([C@H]4Oc5cc(O)cc([O-])c5C(=O)[C@@H]4O)ccc3O[C@@H]2CO)ccc1O</chem> | 6  |
| S84  | PTDBSUB00457 | <chem>Cc1cc(O)c2c(c1)O[C@H](c1ccc(O)c(O)c1)CC2O</chem>                                     | 6  |
| S85  | PTDBSUB00475 | <chem>Oc1ccc(C2=COc3cc(O)cc(O)c3C2O)cc1</chem>                                             | 6  |
| S86  | PTDBSUB00367 | <chem>Cn1c(O)c2c3c(c4c(c2c1O)=c1cccc1=N4)N=c1cccc1=3</chem>                                | 6  |
| S87  | PTDBSUB00144 | <chem>COc1c(O)c(=C2C=Nc3cccc32)c(OC)c(O)c1=C1C=Nc2cccc21</chem>                            | 6  |
| S88  | PTDBSUB00396 | <chem>O=C([O-])c1cccc2c1Nc1cccc1N2</chem>                                                  | 6  |
| S89  | PTDBSUB00385 | <chem>CC(=O)O[C@H]1[C@@H](C)C[NH+](C)[C@@H]2Cc3c[nH]c4cccc(c34)[C@@H]12</chem>             | 7  |
| S90  | PTDBSUB00388 | <chem>CC(=O)O[C@H]1[C@H](C)C[NH+](C)[C@@H]2Cc3c[nH]c4cccc(c34)[C@@H]12</chem>              | 7  |
| S91  | PTDBSUB00136 | <chem>CC(=O)/C=C/c1c[nH]c2cccc12</chem>                                                    | 8  |
| S92  | PTDBSUB00300 | <chem>O=C([O-])/C=C/c1c[nH]c2cccc12</chem>                                                 | 8  |
| S93  | PTDBSUB00359 | <chem>O=C1NCc2c1c1c3cccc3[nH]c1c1[nH]c3cccc3c21</chem>                                     | 8  |
| S94  | PTDBSUB00364 | <chem>O=C1N[C@@H](O)c2c1c1c3cccc3[nH]c1c1[nH]c3cccc3c21</chem>                             | 8  |
| S95  | PTDBSUB00148 | <chem>C=c1c(OC)c(-c2c(CC=C(C)C)[nH]c3cccc23)c(=C)c(OC)c1-c1c[nH]c2cccc12</chem>            | 8  |
| S96  | PTDBSUB00151 | <chem>C=CC(C)(C)n1cc(C2=C(OC)C(=O)C(c3c[nH]c4cccc34)=C(OC)C2=O)c2cccc21</chem>             | 8  |
| S97  | PTDBSUB00703 | <chem>[NH3+][C@H](Cc1cc(l)c([O-])c(l)c1)C(=O)[O-]</chem>                                   | 9  |
| S98  | PTDBSUB00370 | <chem>[NH3+][C@@H](Cc1cc(Br)c([O-])c(Br)c1)C(=O)[O-]</chem>                                | 9  |
| S99  | PTDBSUB00373 | <chem>[NH3+][C@@H](Cc1cc(l)c([O-])c(l)c1)C(=O)[O-]</chem>                                  | 9  |
| S100 | PTDBSUB00548 | <chem>[NH3+][C@@H](Cc1ccc([O-])c([N+](=O)[O-])c1)C(=O)[O-]</chem>                          | 9  |
| S101 | PTDBSUB00706 | <chem>[NH3+][C@H](Cc1ccc([O-])c([N+](=O)[O-])c1)C(=O)[O-]</chem>                           | 9  |
| S102 | PTDBSUB00106 | <chem>[NH3+][C@@H](Cc1ccc(O)cc1)C(=O)[O-]</chem>                                           | 9  |
| S103 | PTDBSUB00542 | <chem>[NH3+][C@H](Cc1ccc(O)cc1)C(=O)[O-]</chem>                                            | 9  |
| S104 | PTDBSUB00321 | <chem>Nc1ccc(C[C@H]([NH3+])C(=O)[O-])cc1</chem>                                            | 9  |
| S105 | PTDBSUB00545 | <chem>Nc1ccc(C[C@@H]([NH3+])C(=O)[O-])cc1</chem>                                           | 9  |
| S106 | PTDBSUB00587 | <chem>[NH3+][C@H](Cc1ccc(O)c(l)c1)C(=O)[O-]</chem>                                         | 9  |
| S107 | PTDBSUB00584 | <chem>[NH3+][C@@H](Cc1ccc(O)c(F)c1)C(=O)[O-]</chem>                                        | 9  |
| S108 | PTDBSUB00382 | <chem>[NH3+][C@@H](Cc1ccc(O)c(l)c1)C(=O)[O-]</chem>                                        | 9  |
| S109 | PTDBSUB00581 | <chem>[NH3+][C@H](Cc1ccc(O)c(F)c1)C(=O)[O-]</chem>                                         | 9  |
| S110 | PTDBSUB00112 | <chem>[NH3+][C@@H](Cc1cccc(O)c1)C(=O)[O-]</chem>                                           | 9  |
| S111 | PTDBSUB00565 | <chem>[NH3+][C@H](Cc1cccc(O)c1)C(=O)[O-]</chem>                                            | 9  |
| S112 | PTDBSUB00562 | <chem>Nc1cc(C[C@@H]([NH3+])C(=O)[O-])ccc1O</chem>                                          | 9  |
| S113 | PTDBSUB00379 | <chem>[NH3+][C@@H](Cc1ccc(O)c(O)c1)C(=O)[O-]</chem>                                        | 9  |
| S114 | PTDBSUB00590 | <chem>[NH3+][C@H](Cc1ccc(O)c(O)c1)C(=O)[O-]</chem>                                         | 9  |
| S115 | PTDBSUB00161 | <chem>Cc1ccc2c(C[C@H]([NH3+])C(=O)[O-])c[nH]c2c1</chem>                                    | 10 |
| S116 | PTDBSUB00164 | <chem>Cc1ccc2c(C[C@@H]([NH3+])C(=O)[O-])c[nH]c2c1</chem>                                   | 10 |
| S117 | PTDBSUB00310 | <chem>[NH3+][C@H](Cc1c[nH]c2cc(F)ccc12)C(=O)[O-]</chem>                                    | 10 |
| S118 | PTDBSUB00441 | <chem>[NH3+][C@@H](Cc1c[nH]c2cc(F)ccc12)C(=O)[O-]</chem>                                   | 10 |
| S119 | PTDBSUB00516 | <chem>[NH3+][C@H](Cc1c[nH]c2ccc(F)cc12)C(=O)[O-]</chem>                                    | 10 |
| S120 | PTDBSUB00438 | <chem>[NH3+][C@@H](Cc1c[nH]c2ccc(F)cc12)C(=O)[O-]</chem>                                   | 10 |
| S121 | PTDBSUB00432 | <chem>[NH3+][C@@H](Cc1c[nH]c2ccc(Br)cc12)C(=O)[O-]</chem>                                  | 10 |
| S122 | PTDBSUB00435 | <chem>[NH3+][C@H](Cc1c[nH]c2ccc(Br)cc12)C(=O)[O-]</chem>                                   | 10 |
| S123 | PTDBSUB00167 | <chem>COc1ccc2[nH]cc(C[C@H]([NH3+])C(=O)[O-])c2c1</chem>                                   | 10 |
| S124 | PTDBSUB00170 | <chem>COc1ccc2[nH]cc(C[C@@H]([NH3+])C(=O)[O-])c2c1</chem>                                  | 10 |

|      |              |                                                        |    |
|------|--------------|--------------------------------------------------------|----|
| S125 | PTDBSUB00155 | Cc1ccc2[nH]cc(C[C@H]([NH3+])C(=O)[O-])c2c1             | 10 |
| S126 | PTDBSUB00158 | Cc1ccc2[nH]cc(C[C@@H]([NH3+])C(=O)[O-])c2c1            | 10 |
| S127 | PTDBSUB00429 | [NH3+][C@@H](Cc1c[nH]c2ccc(O)cc12)C(=O)[O-]            | 10 |
| S128 | PTDBSUB00511 | [NH3+][C@H](Cc1c[nH]c2ccc(O)cc12)C(=O)[O-]             | 10 |
| S129 | PTDBSUB00303 | Cn1cc(C[C@@H]([NH3+])C(=O)[O-])c2ccccc21               | 11 |
| S130 | PTDBSUB00109 | [NH3+][C@@H](Cc1ccccc1O)C(=O)[O-]                      | 11 |
| S131 | PTDBSUB00558 | [NH3+][C@H](Cc1ccccc1O)C(=O)[O-]                       | 11 |
| S132 | PTDBSUB00313 | Cc1cccc2c(C[C@@H]([NH3+])C(=O)[O-])c[nH]c12            | 11 |
| S133 | PTDBSUB00407 | Cc1cccc2c(C[C@H]([NH3+])C(=O)[O-])c[nH]c12             | 11 |
| S134 | PTDBSUB00120 | Cc1cccc2[nH]cc(C[C@H]([NH3+])C(=O)[O-])c12             | 11 |
| S135 | PTDBSUB00306 | Cc1cccc2[nH]cc(C[C@@H]([NH3+])C(=O)[O-])c12            | 11 |
| S136 | PTDBSUB00123 | COc1cccc2[nH]cc(C[C@H]([NH3+])C(=O)[O-])c12            | 11 |
| S137 | PTDBSUB00126 | Nc1cccc2[nH]cc(C[C@H]([NH3+])C(=O)[O-])c12             | 11 |
| S138 | PTDBSUB00274 | CC(C)=CCc1cc(C)cc2[nH]cc(C[C@H]([NH3+])C(=O)[O-])c12   | 12 |
| S139 | PTDBSUB00276 | CC(C)=CCc1cc(C)cc2[nH]cc(C[C@@H]([NH3+])C(=O)[O-])c12  | 12 |
| S140 | PTDBSUB00270 | CC(C)=CCc1c(C)ccc2[nH]cc(C[C@H]([NH3+])C(=O)[O-])c12   | 12 |
| S141 | PTDBSUB00272 | CC(C)=CCc1c(C)ccc2[nH]cc(C[C@@H]([NH3+])C(=O)[O-])c12  | 12 |
| S142 | PTDBSUB00278 | COc1ccc2[nH]cc(C[C@H]([NH3+])C(=O)[O-])c2c1CC=C(C)C    | 12 |
| S143 | PTDBSUB00281 | COc1ccc2[nH]cc(C[C@@H]([NH3+])C(=O)[O-])c2c1CC=C(C)C   | 12 |
| S144 | PTDBSUB00239 | CC(C)=CCc1c(C)ccc2c(C[C@H]([NH3+])C(=O)[O-])c[nH]c12   | 12 |
| S145 | PTDBSUB00242 | CC(C)=CCc1c(C)ccc2c(C[C@@H]([NH3+])C(=O)[O-])c[nH]c12  | 12 |
| S146 | PTDBSUB00233 | CC(C)=CCc1cc(C)cc2c(C[C@H]([NH3+])C(=O)[O-])c[nH]c12   | 12 |
| S147 | PTDBSUB00236 | CC(C)=CCc1cc(C)cc2c(C[C@@H]([NH3+])C(=O)[O-])c[nH]c12  | 12 |
| S148 | PTDBSUB00245 | COc1cc(CC=C(C)C)c2[nH]cc(C[C@H]([NH3+])C(=O)[O-])c2c1  | 12 |
| S149 | PTDBSUB00248 | COc1cc(CC=C(C)C)c2[nH]cc(C[C@@H]([NH3+])C(=O)[O-])c2c1 | 12 |
| S150 | PTDBSUB00251 | CC(C)=CCc1cccc2[nH]cc(C[C@H]([NH3+])C(=O)[O-])c12      | 13 |
| S151 | PTDBSUB00253 | CC(C)=CCc1cccc2[nH]cc(C[C@@H]([NH3+])C(=O)[O-])c12     | 13 |
| S152 | PTDBSUB00266 | CC(C)=CCc1cccc2[nH]cc(C[C@H](O)C(=O)[O-])c12           | 13 |
| S153 | PTDBSUB00268 | CC(C)=CCc1cccc2[nH]cc(C[C@@H](O)C(=O)[O-])c12          | 13 |
| S154 | PTDBSUB00255 | CC(C)=CCc1cccc2[nH]cc(C[C@H]([NH3+])CC(=O)[O-])c12     | 13 |
| S155 | PTDBSUB00260 | C[NH2+][C@@H](Cc1c[nH]c2ccc(CC=C(C)C)c12)C(=O)[O-]     | 13 |
| S156 | PTDBSUB00257 | CC(C)=CCc1cccc2[nH]cc(CC[NH3+])c12                     | 13 |
| S157 | PTDBSUB00262 | CC(C)=CCc1cccc2[nH]cc(C[C@@](C)([NH3+])C(=O)[O-])c12   | 13 |
| S158 | PTDBSUB00264 | CC(C)=CCc1cccc2[nH]cc(C[C@](C)([NH3+])C(=O)[O-])c12    | 13 |
| S159 | PTDBSUB00205 | CC(C)=CCc1cccc2c(C[C@H]([NH3+])C(=O)[O-])c[nH]c12      | 14 |
| S160 | PTDBSUB00208 | CC(C)=CCc1cccc2c(C[C@@H]([NH3+])C(=O)[O-])c[nH]c12     | 14 |
| S161 | PTDBSUB00226 | CC(C)=CCc1cccc2c(C[C@H](O)C(=O)[O-])c[nH]c12           | 14 |
| S162 | PTDBSUB00229 | CC(C)=CCc1cccc2c(C[C@@H](O)C(=O)[O-])c[nH]c12          | 14 |
| S163 | PTDBSUB00211 | CC(C)=CCc1cccc2c(C[C@H]([NH3+])CC(=O)[O-])c[nH]c12     | 14 |
| S164 | PTDBSUB00217 | C[NH2+][C@@H](Cc1c[nH]c2c(CC=C(C)C)ccc12)C(=O)[O-]     | 14 |
| S165 | PTDBSUB00214 | CC(C)=CCc1cccc2c(CC[NH3+])c[nH]c12                     | 14 |
| S166 | PTDBSUB00220 | CC(C)=CCc1cccc2c(C[C@@](C)([NH3+])C(=O)[O-])c[nH]c12   | 14 |
| S167 | PTDBSUB00223 | CC(C)=CCc1cccc2c(C[C@](C)([NH3+])C(=O)[O-])c[nH]c12    | 14 |



**Table S2:** Structures, IDs, enzyme-related yields and number of matched PrenDB reactions.

| Substrate                                                                           | ID | Product yield [%] |        |        | Matched reactions |
|-------------------------------------------------------------------------------------|----|-------------------|--------|--------|-------------------|
|                                                                                     |    | FtmPT1            | FgaPT2 | CdpNPT |                   |
| 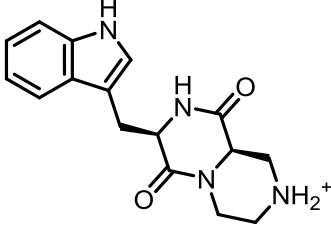   | 1  | 94.1              | 18.2   | 41.3   | 299               |
|    | 2  | 81.3              | 80.1   | 29.5   | 299               |
|  | 3  | -                 | 3.2    | 22.1   | 299               |
|  | 4  | -                 | -      | -      | 6                 |
|  | 5  | -                 | -      | 0.9    | 33                |
|  | 6  | -                 | -      | -      | 57                |

|                                                                                     |    |      |      |      |     |
|-------------------------------------------------------------------------------------|----|------|------|------|-----|
| 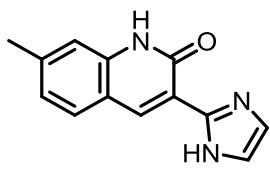   | 7  | 7.0  | -    | 10.1 | 57  |
|    | 8  | -    | -    | -    | 6   |
|    | 9  | -    | 5.3  | -    | 17  |
|   | 10 | 40.8 | 28.9 | 99.7 | 233 |
|  | 11 | 48.1 | 17.1 | 88.1 | 238 |
|  | 12 | 8.5  | -    | 14.4 | 299 |
|  | 13 | 71.0 | 31.7 | 47.2 | 231 |



|                                                                                     |    |      |      |      |     |
|-------------------------------------------------------------------------------------|----|------|------|------|-----|
| 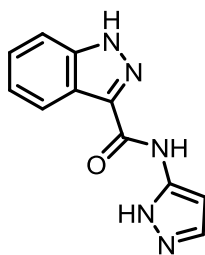   | 14 | 2.0  | -    | 2.6  | 50  |
|    | 15 | -    | -    | -    | 58  |
|    | 16 | 68.8 | 34.8 | 29.7 | 20  |
|   | 17 | -    | -    | -    | 14  |
|  | 18 | 89.1 | 84.9 | 62.0 | 299 |
|  | 19 | 76.4 | 6.2  | 46.9 | 233 |

|                                                                                     |                 |      |      |      |     |
|-------------------------------------------------------------------------------------|-----------------|------|------|------|-----|
| 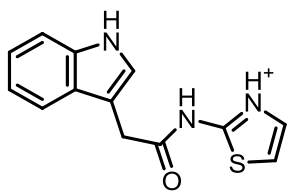   | 20              | 76.0 | 37.4 | 97.4 | 233 |
|    | 21              | 98.6 | 99.2 | 99.3 | 233 |
|    | 22              | -    | -    | -    | 231 |
|   | 23              | 64.8 | 75.0 | 65.2 | 233 |
|  | 24 <sup>a</sup> | -    | -    | -    | 50  |
|  | 25              | -    | -    | -    | 50  |
|  | 26              | -    | -    | -    | 33  |

|                                                                                     |                 |      |      |      |     |
|-------------------------------------------------------------------------------------|-----------------|------|------|------|-----|
| 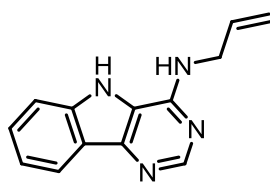   | 27              | 8.7  | 82.9 | 11.8 | 137 |
|    | 28              | -    | -    | -    | 23  |
|    | 29 <sup>b</sup> | -    | -    | -    | 6   |
|    | 30              | 60.1 | 59.4 | 96.1 | 229 |
|  | 31              | -    | -    | -    | 50  |
|  | 32              | 47.5 | 44.7 | -    | 299 |
|  | 33              | 99.5 | 99.1 | 87.2 | 233 |

|                                                                                     |                 |      |      |      |     |
|-------------------------------------------------------------------------------------|-----------------|------|------|------|-----|
| 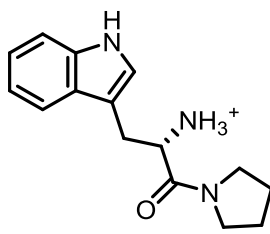   | 34              | 44.4 | 19.9 | 94.8 | 299 |
|    | 35              | 35.5 | 16.3 | 94.1 | 299 |
|    | 36 <sup>b</sup> | -    | -    | -    | 77  |
|   | 37              | -    | -    | -    | 137 |
|  | 38              | -    | -    | -    | 235 |
|  | 39 <sup>b</sup> | 3.8  | -    | 2.8  | 33  |
|  | 40              | 51.5 | 4.4  | 9.2  | 237 |

|                                                                                   |    |     |      |      |     |
|-----------------------------------------------------------------------------------|----|-----|------|------|-----|
| 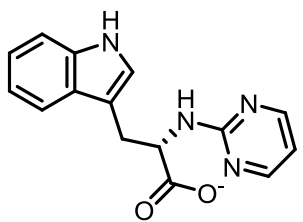 | 41 | 9.9 | 22.5 | 13.5 | 325 |
|  | 42 | -   | 14.9 | 38.1 | 299 |

<sup>a</sup> Compound **24** is the imidic acid tautomer of **25** and was thus excluded from further consideration in this work. Total and relative numbers throughout the manuscript reflect the number of unique compounds, i.e. 38.

<sup>b</sup> These compounds could not be obtained as ordered and were excluded from further consideration in this work
